# Supplementary material for: Optimisation of recombinant TNFα production in Escherichia coli using GFP fusions and flow cytometry
Source: Frontiers journal article supplement (doi:10.3389/fbioe.2023.1171823), 2023-08-02
Supplement: Data_Sheet_1.pdf [file Data_Sheet_1.pdf]

## SUPPLEMENTAL INFORMATION

### Optimisation of recombinant TNF $\alpha$ production in *Escherichia coli* using GFP fusions and flow cytometry

Nurul Asma Hasliza Zulkifly<sup>1,3</sup>, Tania Selas Castiñeiras<sup>1,2</sup>, and Tim W Overton<sup>1\*</sup>

<sup>1</sup> School of Chemical Engineering and Institute of Microbiology and Infection, The University of Birmingham, Edgbaston, Birmingham, B15 2TT, UK.

<sup>2</sup> Cobra Biologics, Stephenson Building, The Science Park, Keele ST5 5SP, UK.

<sup>3</sup> Current address: School of Agriculture Science and Biotechnology, Faculty of Bioresources and Food Industry, Universiti Sultan Zainal Abidin, Besut Campus, 22200 Besut, Terengganu, Malaysia.

\*to whom correspondence should be addressed: [t.w.overton@bham.ac.uk](mailto:t.w.overton@bham.ac.uk) +44 (0) 121 414 5306

**Supplemental Figure S1. Single cell analysis of T7 expression system cultures at 30 °C with 0.4 % glycerol.** *E. coli* BL21-T7 cultures carrying either p2T7-TNFαGFP (TNFα-GFP; a) or p2T7-GFP (GFP; b) were grown at 30 °C in terrific broth with 0.4 % glycerol as a carbon source. At an OD<sub>650</sub> of 0.5, arabinose (0.015% or 0.2%) was added to four cultures and two were left uninduced. At regular intervals, samples were taken and FCM was used to measure green fluorescence of individual cells; left and right plots correspond to duplicate cultures. Timepoints relate to the time the cultures were grown; 4 h refers to pre-induction with arabinose. These data correspond to Figure 1.

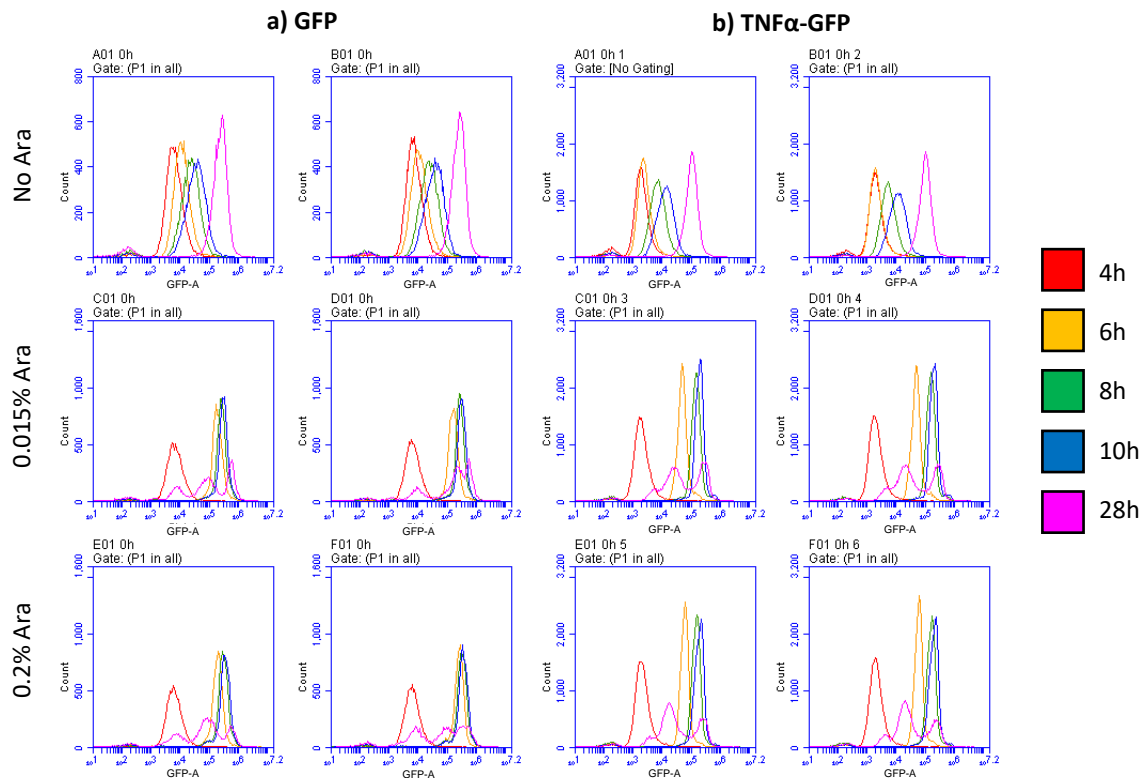

## Supplemental Figure S2. Single cell analysis of untransformed *E. coli*

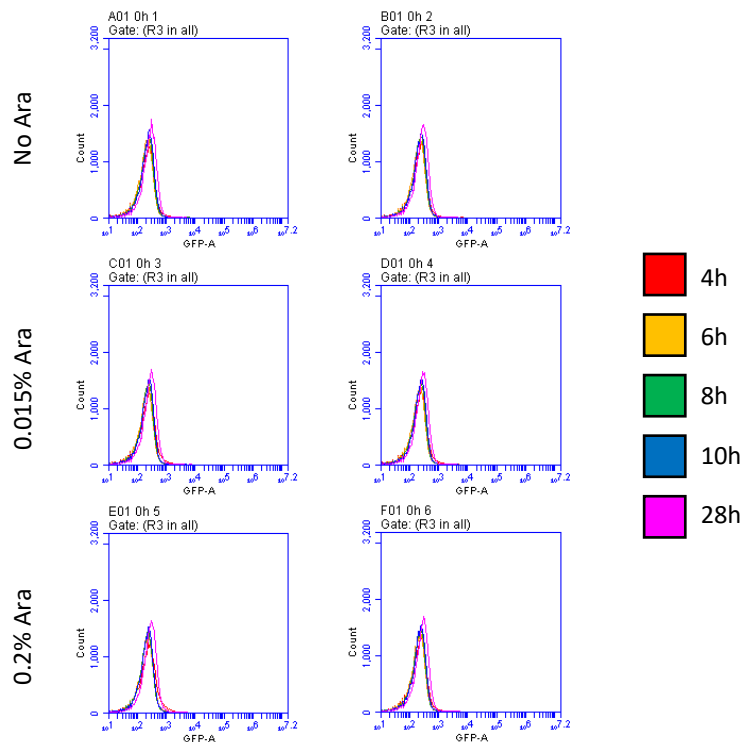

**Supplemental Figure S2. Single cell analysis of untransformed *E. coli*.** Untransformed *E. coli* BL21-A cultures were grown at 30 °C in terrific broth with 0.4 % glycerol as a carbon source. At an OD<sub>650</sub> of 0.5, arabinose (0.015% or 0.2%) was added to four cultures and two were left uninduced. At regular intervals, samples were taken and FCM was used to measure green fluorescence of individual cells; left and right plots correspond to duplicate cultures. Timepoints relate to the time the cultures were grown; 4 h refers to pre-induction with arabinose.

**Supplemental Figure S3. Single cell analysis of T7 expression system cultures at 30 °C with 0.4 % glucose.**

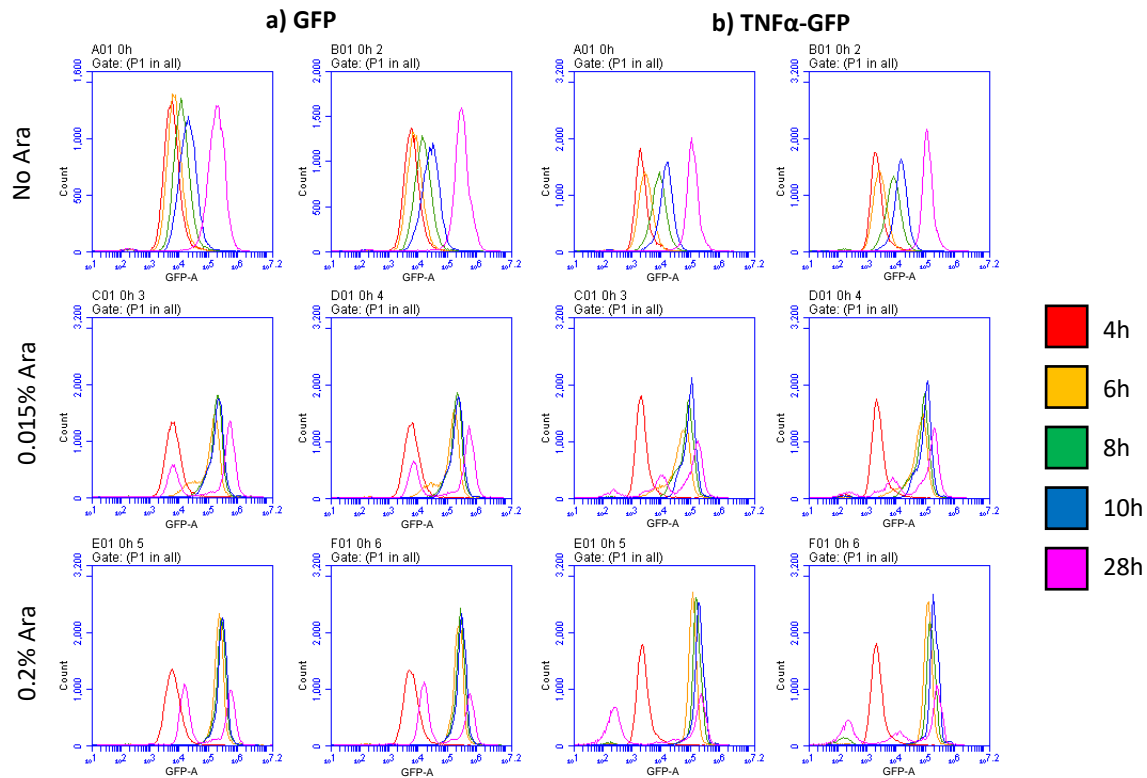

**Supplemental Figure S3. Single cell analysis of T7 expression system cultures at 30 °C with 0.4 % glucose.** *E. coli* BL21-T7 cultures carrying either p2T7-TNF $\alpha$ GFP (TNF $\alpha$ -GFP; a) or p2T7-GFP (GFP; b) were grown at 30 °C in terrific broth with 0.4 % glucose as a carbon source. At an OD<sub>650</sub> of 0.5, arabinose (0.015% or 0.2%) was added to four cultures and two were left uninduced. At regular intervals, samples were taken and FCM was used to measure green fluorescence of individual cells; left and right plots correspond to duplicate cultures. Timepoints relate to the time the cultures were grown; 4 h refers to pre-induction with arabinose. These data correspond to Figure 2.

**Supplemental Figure S4. Growth and single cell analysis of T7 expression system at 30 °C with 0.8 % glucose.**

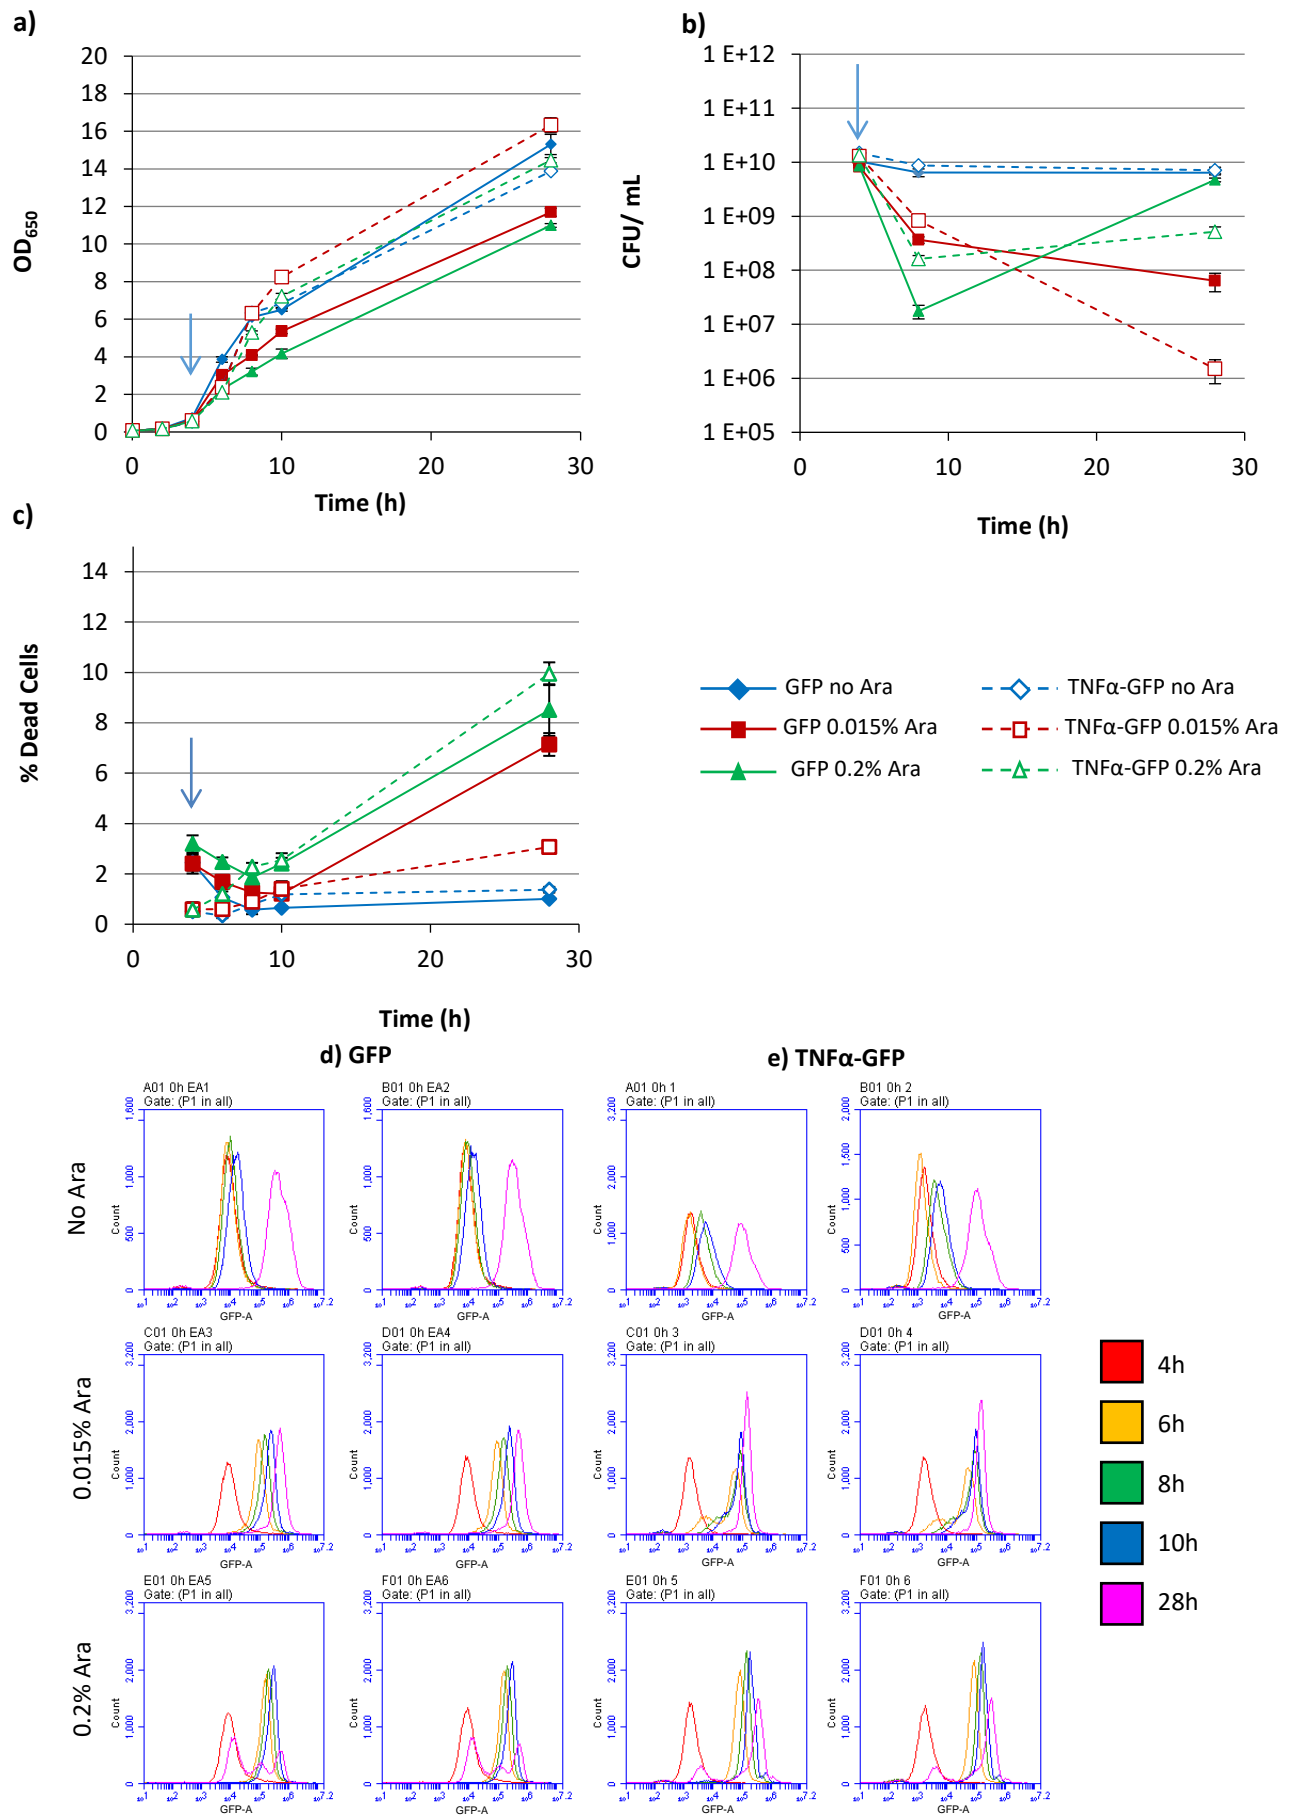

**Supplemental Figure S4. Growth and single cell analysis of T7 expression system at 30 °C with 0.8 % glucose.** *E. coli* BL21-T7 cultures carrying either p2T7-TNFαGFP (TNFα-GFP) or p2T7-GFP (GFP) were grown at 30 °C in terrific broth with 0.8 % glucose as a carbon source. At an OD<sub>650</sub> of 0.5 (indicated by an arrow), arabinose (0.015% or 0.2%) was added to four cultures and two were left uninduced. At regular intervals, samples were taken and OD<sub>650</sub> (a) and CFU (b) were measured. FCM was used to determine the percentage of dead cells (c) after staining with PI. Histograms (d & e) show green fluorescence of individual cells; left and right plots correspond to duplicate cultures. These data correspond to Figure 3.

**Supplemental Figure S5. Single cell analysis of T7 expression system cultures at 37 °C with 0.4 % glycerol.**

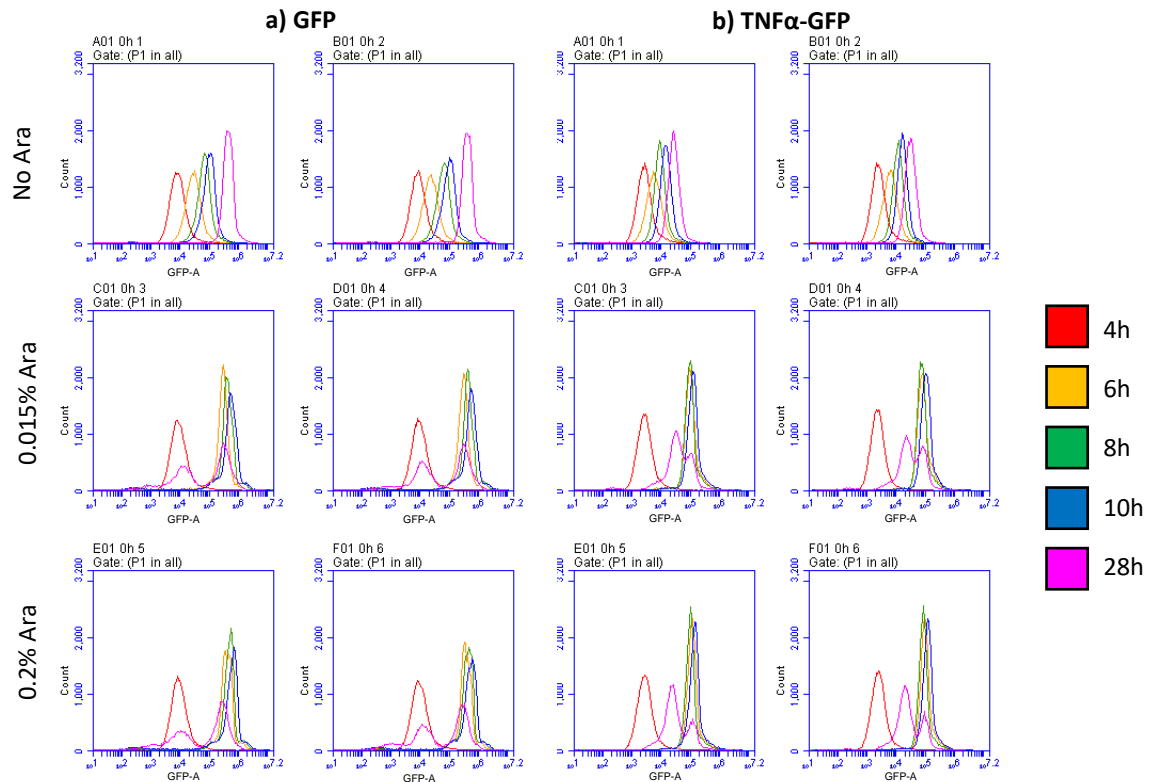

**Supplemental Figure S5. Single cell analysis of T7 expression system cultures at 37 °C with 0.4 % glycerol.** *E. coli* BL21-T7 cultures carrying either p2T7-TNFαGFP (TNFα-GFP; a) or p2T7-GFP (GFP; b) were grown at 37 °C in terrific broth with 0.4 % glycerol as a carbon source. At an OD<sub>650</sub> of 0.5, arabinose (0.015% or 0.2%) was added to four cultures and two were left uninduced. At regular intervals, samples were taken and FCM was used to measure green fluorescence of individual cells; left and right plots correspond to duplicate cultures. Timepoints relate to the time the cultures were grown; 4 h refers to pre-induction with arabinose. These data correspond to Figure 4.

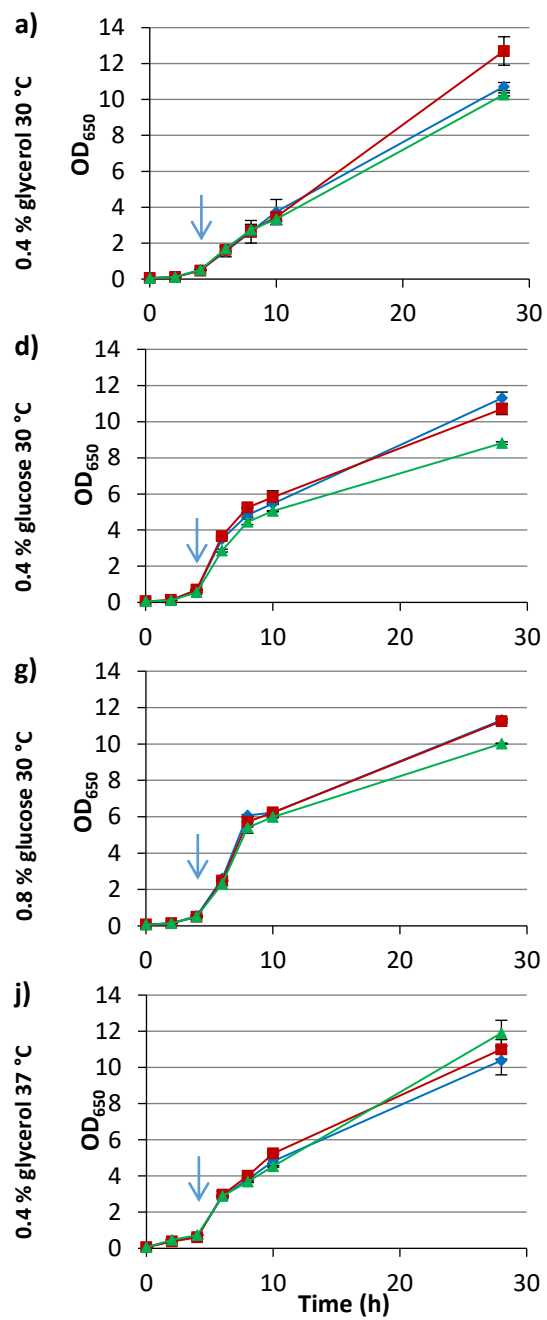



**Supplemental Figure S6. pBAD expression system for the production of GFP.** *E. coli* BL21-A cultures carrying pLBAD-GFP was grown at: 30 °C in terrific broth with 0.4 % glycerol (a-c); 30 °C in terrific broth with 0.4 % glucose (d-f); 30 °C in terrific broth with 0.8 % glucose (g-i); or 37 °C in terrific broth with 0.4 % glycerol (j-l). At an OD<sub>650</sub> of 0.5 (indicated by an arrow), arabinose (0.015% or 0.2%) was added to four cultures and two were left uninduced. At regular intervals, samples were taken and OD<sub>650</sub> (a,d,g,j) and CFU (b,e,h,k) were measured and FCM was used to determine the percentage of dead cells following staining with PI (c,f,i,l).

**Supplemental Figure S7. Single cell analysis of pBAD expression system cultures.**

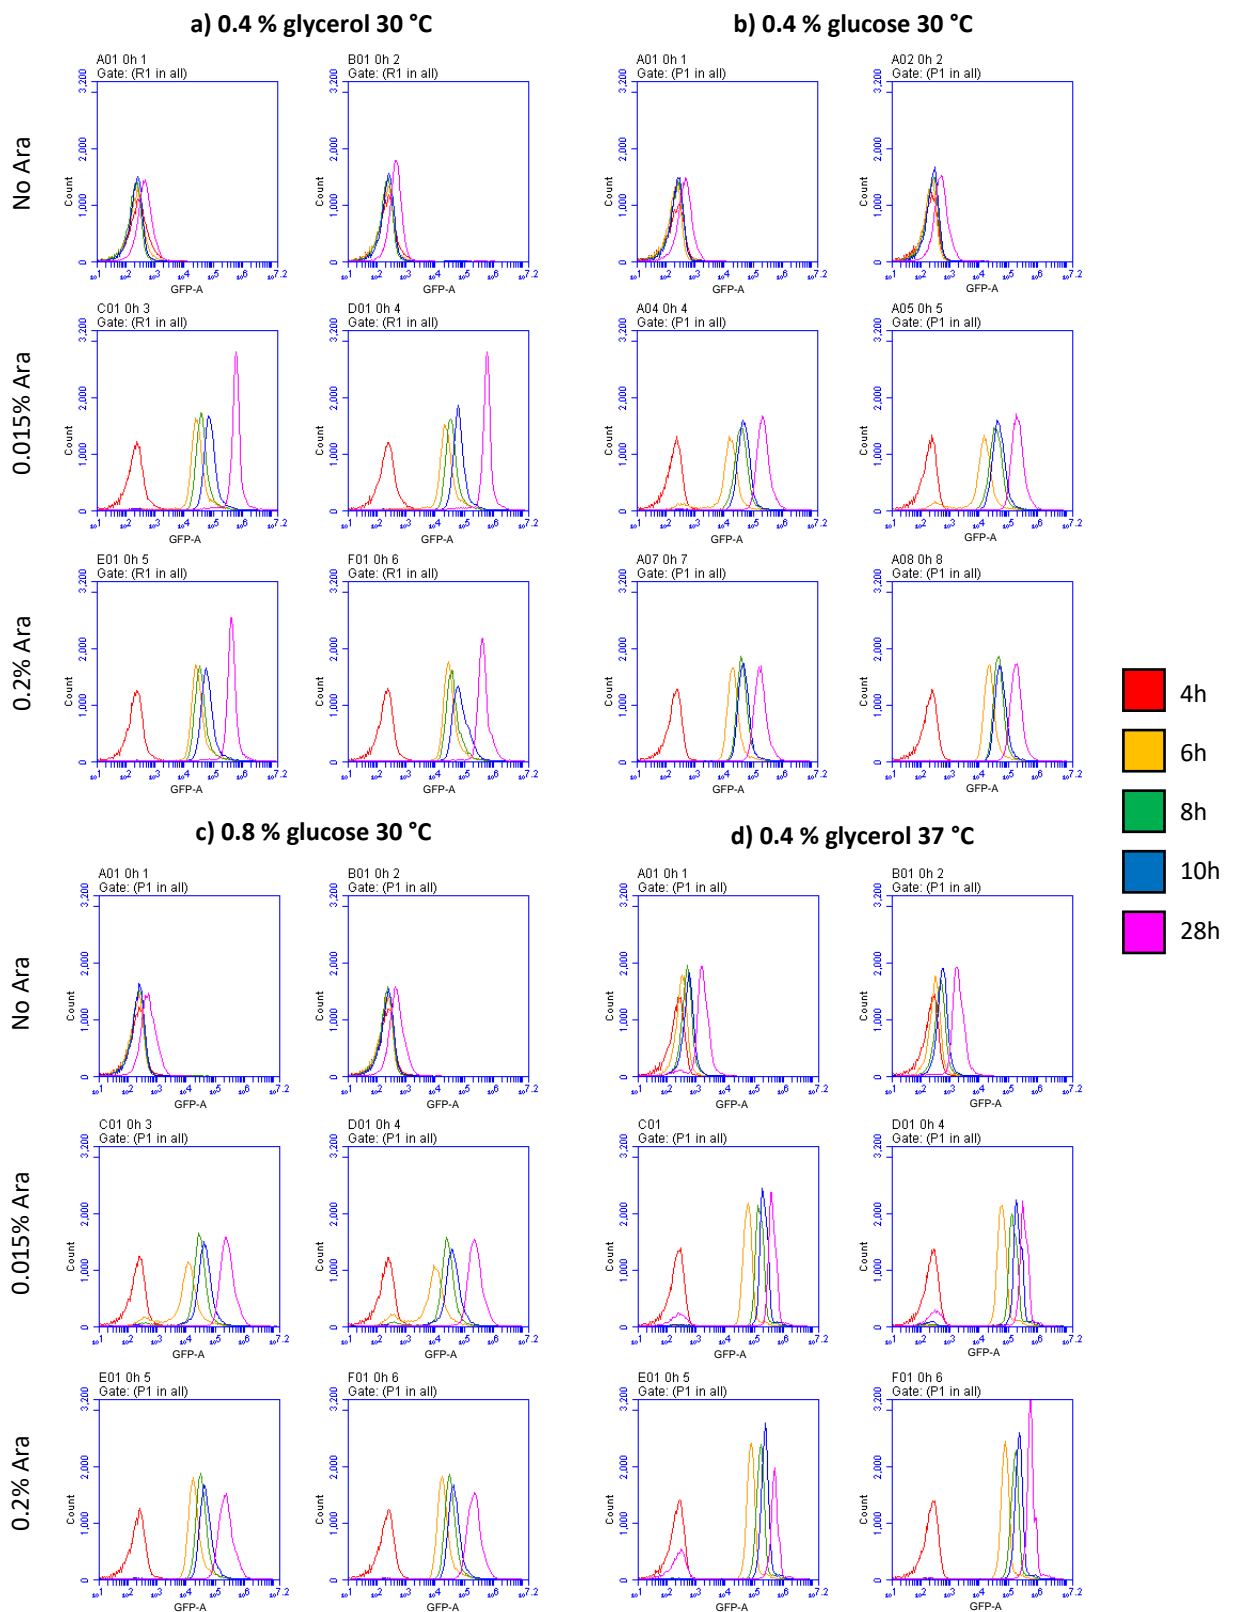

**Supplemental Figure S7. Single cell analysis of pBAD expression system cultures.** *E. coli* BL21-A cultures carrying pLBAD-GFP was grown at: 30 °C in terrific broth with 0.4 % glycerol (a); 30 °C in terrific broth with 0.4 % glucose (b); 30 °C in terrific broth with 0.8 % glucose (c); or 37 °C in terrific broth with 0.4 % glycerol (d). At an OD<sub>650</sub> of 0.5, arabinose (0.015% or 0.2%) was added to four cultures and two were left uninduced. At regular intervals, samples were taken and FCM was used to measure green fluorescence of individual cells; left and right plots correspond to duplicate cultures. Timepoints relate to the time the cultures were grown; 4 h refers to pre-induction with arabinose. These data correspond to Figure 5 and Supplemental Figure S6.

**Supplemental Figure S8. Fermentation data for T7 expression system cultures in bioreactors.**

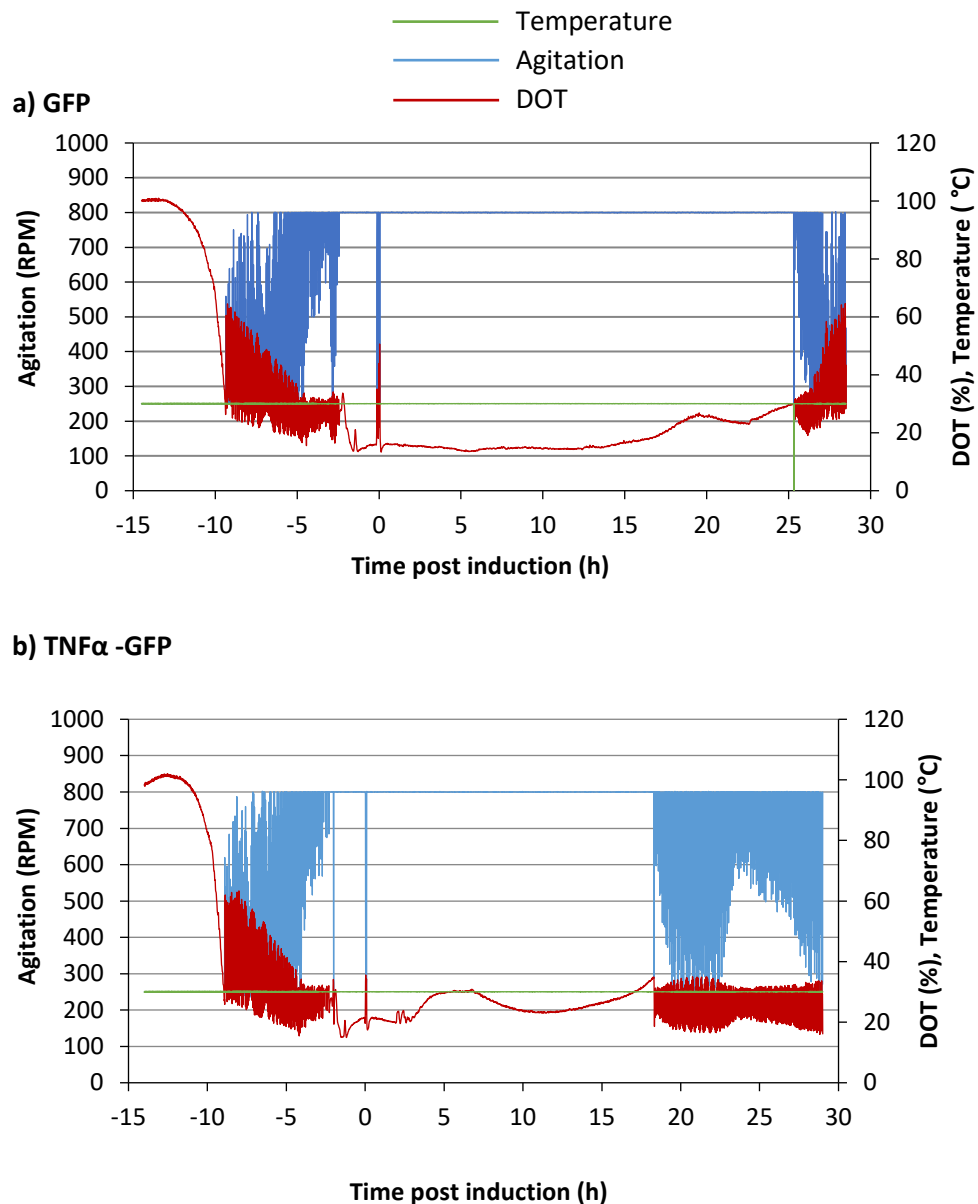

**Supplemental Figure S8. Fermentation data for T7 expression system cultures in bioreactors.** *E. coli* BL21-T7 cultures carrying either p2T7-GFP (GFP; a) or p2T7-TNFαGFP (TNFα-GFP; b) were grown at 30 °C in a semi-defined medium in a bioreactor as described in the text. Temperature, DOT and agitation speed were continuously logged by the bioreactor.

# Supplemental Figure S9. Single cell analysis of T7 expression system cultures in bioreactors

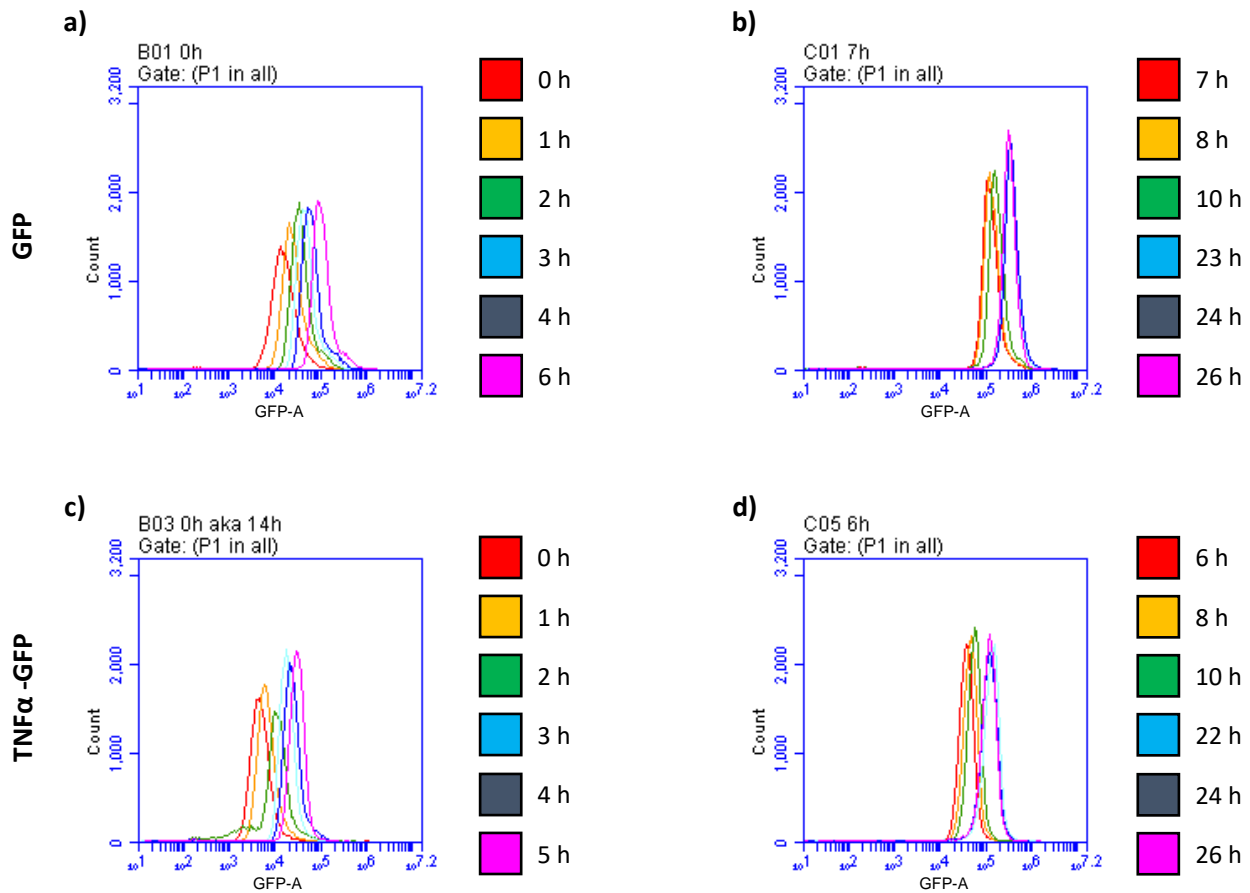

**Supplemental Figure S9. Single cell analysis of T7 expression system cultures in bioreactors.** *E. coli* BL21-T7 cultures carrying either p2T7-GFP (GFP; a,b) or p2T7-TNFαGFP (TNFα-GFP; c,d) were grown at 30 °C in a semi-defined medium in a bioreactor as described in the text. Samples were taken at regular intervals and analysed by FCM. Histograms show green fluorescence of individual cells. These data correspond to Figure 6 and Supplemental Figure S8.
